# Supplementary material for: Altering the deposition behavior and enhancing the interface stability via a gradient-potassiophilic scaffold achieve a highly efficient and dendrite-free potassium metal anode
Source: Royal Society of Chemistry journal article supplement (doi:10.1039/d5ta08793g), 2025-12-11
Supplement: d5ta08793g1.pdf [file d5ta08793g1.pdf]

## Supplementary Information

### **Altering the deposition behavior and enhancing the interface stability via a gradient-potassiophilic scaffold achieve a highly efficient and dendrite-free potassium metal anode**

Dongting Zhang <sup>a, b\*</sup>, Minpeng Li <sup>c, d</sup>, Yuping Qiu <sup>c, d</sup>, Weihai Yi <sup>c, d</sup>, Hanyuan Che <sup>c, d</sup>,  
Wenjie Shi <sup>c, d</sup>, Ping Wang <sup>e</sup>, Hongruo Ma <sup>a, b</sup>, Cuiying Lu <sup>f\*</sup>, Maocheng Liu <sup>c, d\*</sup>

<sup>a</sup> Gansu Natural Energy Research Institute, Gansu Academy of Sciences, Lanzhou 730046, China

<sup>b</sup> Key Laboratory of Solar Energy Utilization, Gansu Province, Lanzhou 730046, China

<sup>c</sup> State Key Laboratory of Advanced Processing and Recycling of Non-ferrous Metals, Lanzhou University of Technology, Lanzhou 730050, People's Republic of China

<sup>d</sup> School of Materials Science and Engineering, Lanzhou University of Technology, Lanzhou 730050, People's Republic of China

<sup>e</sup> School of Chemical Engineering, Jiangxi Normal University, Nanchang 330022, China

<sup>f</sup> Shanxi Provincial Key Laboratory of Clean Utilization of Low-Rank Coal, Yulin university, Yulin, 71900, China

\* Corresponding author: zdongt1021@163.com, lucuiying126@126.com, liumc@lut.edu.cn

## **Experimental Section**

### **Preparation of 3D-T host**

3D-T host was prepared via simple suction filtration and etching template processes. The negatively charge single-layer  $\text{Ti}_3\text{CN}$  solution and the positively charge  $\text{SiO}_2$  template solution was mixed and reacted to obtain  $\text{Ti}_3\text{CN-SiO}_2$  solution. After filtering via the vacuum filtration pump, the  $\text{Ti}_3\text{CN-SiO}_2$  film can be obtained. The  $\text{SiO}_2$  template in as-obtained  $\text{Ti}_3\text{CN-SiO}_2$  film can be removed via 40% HF etching method to obtain 3D-T host.

### **Preparation of 3D-T/TSF host**

Firstly, the negatively charge single-layer  $\text{Ti}_3\text{CN}$  solution and the positively charge  $\text{SiO}_2$  template solution was mixed and reacted to obtain  $\text{Ti}_3\text{CN-SiO}_2$  solution (named as solution A). Secondly, the 5 mL  $\text{SnF}_2$  (1 M) solution was added and stirred in solution A to obtain solution B. The low-potassiophilicity  $\text{Ti}_3\text{CN}$  on the separator side (T) was prepared by filtering solution A. Then the  $\text{Ti}_3\text{CN-SiO}_2/\text{Ti}_3\text{CN-SiO}_2\text{-SnF}_2$  film was obtained by continued suction filtration of solution B. Thirdly, 3D- $\text{Ti}_3\text{CN}/\text{Ti}_3\text{CN-SnF}_2$  film was prepared by 40% HF etching method. After immersing and freeze-drying, the 3D-T/TSF host was obtained. The 3D-T/TSF host composed by the low-potassiophilicity  $\text{Ti}_3\text{CN}$  on the separator side (T) and a high-potassiophilicity region on the anode side employing the  $\text{Ti}_3\text{CN}$  blended with  $\text{SnF}_2$  nanoparticles (TSF).

### **Material Characterizations**

The crystal structures of the 3D-T and 3D-T/TSF scaffolds were characterized on a D8 Advance X-ray diffractometer (XRD, Rigaku D/MAX 2400 Japan) using  $\text{Cu K}\alpha$  radiation. The microstructures of the  $\text{Ti}_3\text{CN}$ , 3D-T and 3D-T/TSF were analyzed by scanning electron

microscopy (SEM, JSM-6510). The compositions of the specimens were determined using X-ray photoelectron spectroscopy (XPS, PHI 5700 ESCA). The specific surface area and porosity were obtained by Brunauer-Emmett-Teller (BET, JWBK200C). The deposition microstructures of 3D-T and 3D-T/TSF scaffolds were observed by scanning electron microscopy (SEM, JSM-6510) and the in-situ optical microscope.

### **Electrochemical Analysis**

Electrochemical tests were performed using CR2032-type coin cells that were assembled in an Ar-filled glove box with  $<0.1$  ppm  $\text{H}_2\text{O}$  and  $\text{O}_2$  levels. The electrolyte was 1.0 M KFSI in DME without any additives. K//3D-T and K//3D-T/TSF half batteries were established by K metal foils as counter electrodes and 3D-T and 3D-T/TSF scaffolds as work electrodes. The voltage profiles of K nucleation on 3D-T and 3D-T/TSF scaffolds were measurement in a LAND CT2001A battery tester (LANHE, Wuhan). Symmetric cells consisted of two 3D-T and 3D-T/TSF scaffolds which deposit with  $5 \text{ mAh cm}^{-2}$  at the current density of  $0.5 \text{ mA cm}^{-2}$ . Galvanostatic cycle and rate capability tests were carried out based on symmetric batteries in a LAND CT2001A battery tester (LANHE, Wuhan). Tafel plots of symmetric batteries were tested on a CHI660D electrochemical workstation (Chenhua, Shanghai). Electrochemical impedance spectroscopy (EIS) was investigated by an AUTOLAB electrochemical workstation.

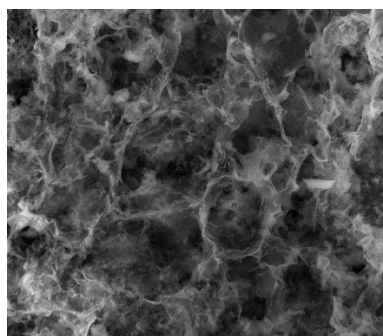

**Figure S1.** Top-view SEM images of 3D-T scaffold.

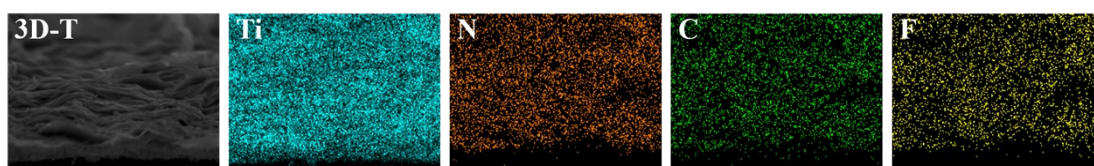

**Figure S2.** Cross-sectional SEM image and EDS mapping images of 3D-T host.

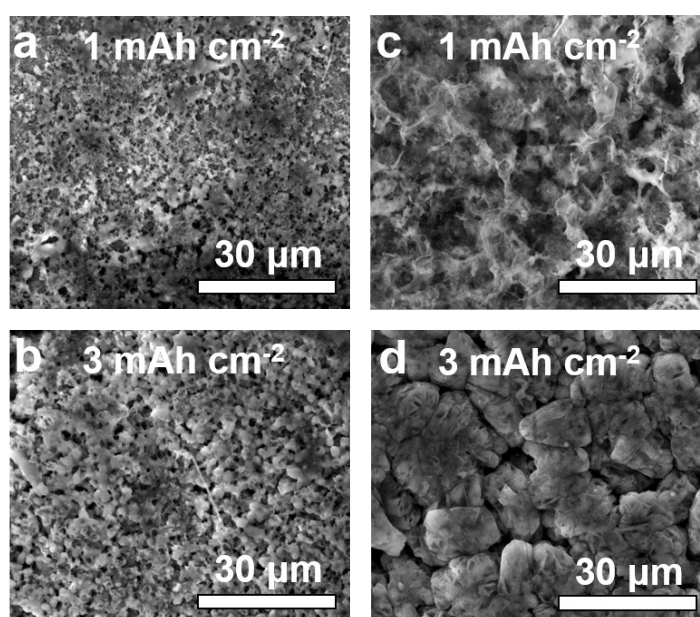

**Figure S3.** Top-view SEM images of 3D-T scaffold after plating a) 1 mAh cm<sup>-2</sup> and b) 3 mAh cm<sup>-2</sup> K metal. Top-view SEM images of 3D-T/TSF scaffold after plating c) 1 mAh cm<sup>-2</sup> and d) 3 mAh cm<sup>-2</sup> K metal.

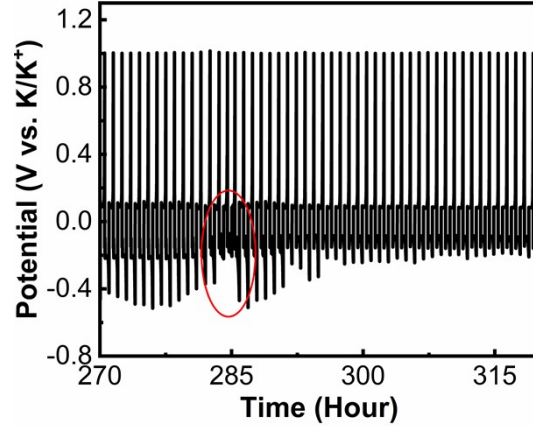

Figure S4. The high-magnification voltage-time profiles of K//3D-T half battery.

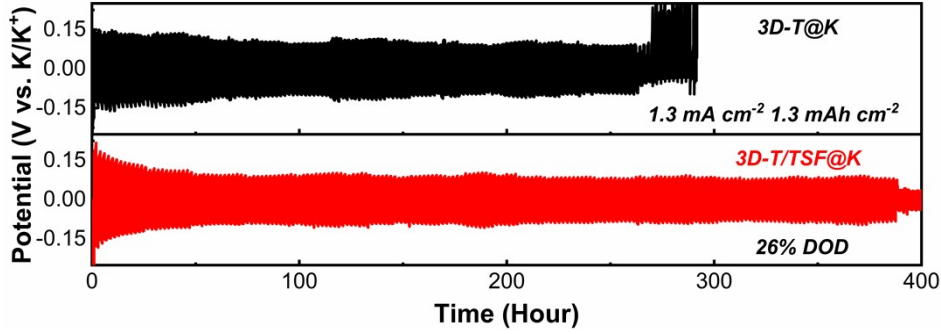

Figure S5. Cycles stability of 3D-T@K//3D-T@K and 3D-T/TSF@K//3D-T/TSF@K symmetric batteries at the current density of  $1.3 \text{ mA cm}^{-2}$  and an area capacity of  $1.3 \text{ mAh cm}^{-2}$  (26% DOD).

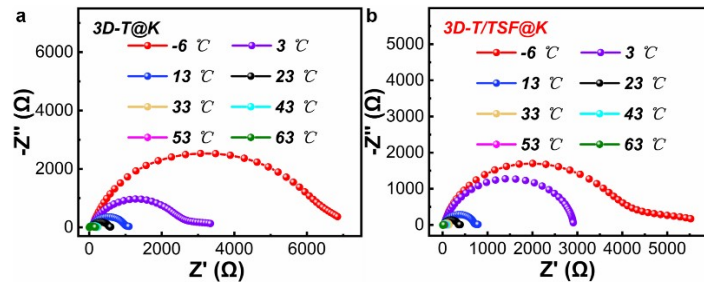

Figure S6. The EIS spectra of (a) 3D-T@K and (b) 3D-T/TSF@K symmetrical batteries at different temperature.

The  $R_{\text{SEI}}$  of 3D-T@K and 3D-T/TSF@K symmetrical batteries gradually decrease with the increased temperature. Meanwhile, 3D-T@K symmetrical battery exhibits more bigger  $R_{\text{SEI}}$  than 3D-T/TSF@K symmetrical battery.

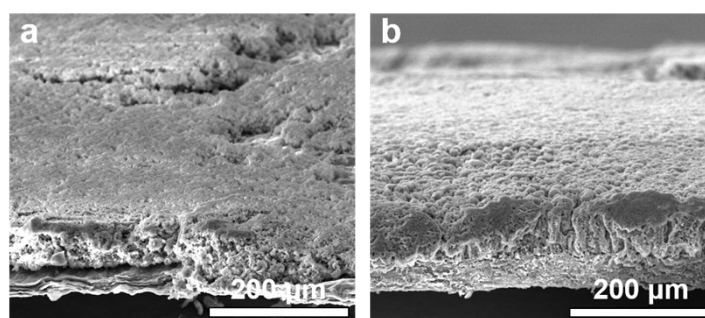

Figure S7. The Cross-sectional SEM images of a) 3D-T@K b) 3D-T/TSF@K anodes after 100<sup>th</sup> plating at 0.5 mA cm<sup>-2</sup> and 0.5 mAh cm<sup>-2</sup>.

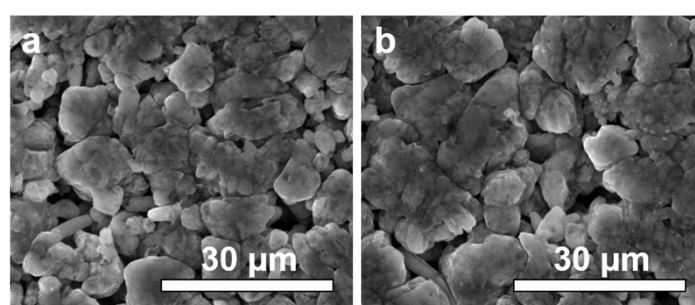

Figure S8. The top-view SEM images of 3D-T/TSF@K anode after 200 cycles at 0.5 mA cm<sup>-2</sup> and 0.5 mAh cm<sup>-2</sup>.

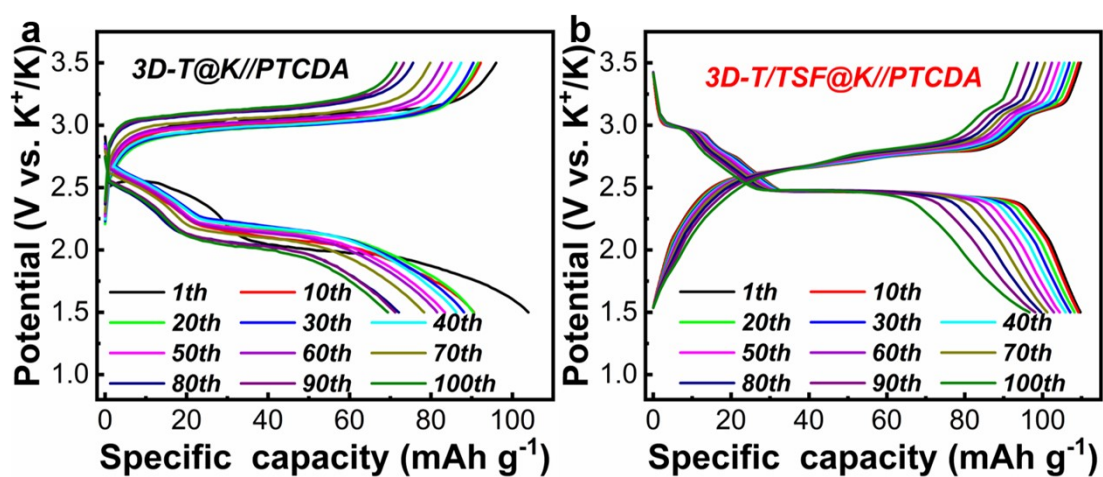

Figure S9. The charge and discharge curves after different cycles at 1C.

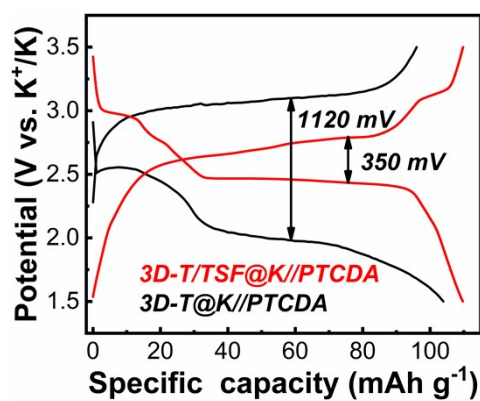

Figure S10. The initial charge and discharge curves at 1C.

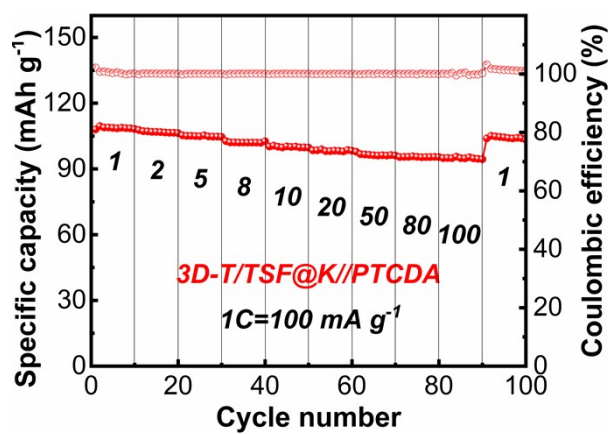

Figure 11. Rate capability of 3D-T/TSF//PTCDA full battery.
